# Supplementary material
Source: PubMed Central journal article supplement (PMC3398511)
Supplement: NIHMS390070-supplement-supplement_1.pdf [file NIHMS390070-supplement-supplement_1.pdf]

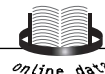

## SUPPLEMENTARY ONLINE DATA

# Fatty liver is associated with reduced SIRT3 activity and mitochondrial protein hyperacetylation

Agnieszka A. KENDRICK<sup>\*1</sup>, Mahua CHOUDHURY<sup>†1</sup>, Shaikh M. RAHMAN<sup>†</sup>, Carrie E. McCURDY<sup>†</sup>, Marisa FRIEDERICH<sup>†</sup>, Johan L. K. VAN HOVE<sup>†</sup>, Peter A. WATSON<sup>‡</sup>, Nicholas BIRDSEY<sup>‡</sup>, Jianjun BAO<sup>§</sup>, David GIUS<sup>||2</sup>, Michael N. SACK<sup>§</sup>, Enxuan JING<sup>¶</sup>, C. Ronald KAHN<sup>¶</sup>, Jacob E. FRIEDMAN<sup>\*†3</sup> and Karen R. JONSCHER<sup>\*</sup>

<sup>\*</sup>Nutrition and Obesity Research Center (NORC), Mass Spectrometry Core Facility, Department of Anesthesiology, University of Colorado School of Medicine, Aurora, CO 80045, U.S.A., <sup>†</sup>Department of Pediatrics, University of Colorado School of Medicine, Aurora, CO 80045, U.S.A., <sup>‡</sup>Denver VA Medical Center, Denver, CO 80220, U.S.A., <sup>§</sup>Translational Medicine Branch, National Heart, Lung, and Blood Institute, National Institutes of Health, Bethesda, MD 20892, U.S.A., <sup>||</sup>Radiation Oncology Branch, Center for Cancer Research, National Cancer Institute, National Institutes of Health, Bethesda, MD 20892, U.S.A., and <sup>¶</sup>Joslin Diabetes Center, Harvard Medical School, Boston, MA 02215, U.S.A.

See the pages that follow for Supplementary Figures S1–S3 and Supplementary Table S1.

<sup>1</sup> These authors contributed equally to this work.

<sup>2</sup> Present address: Department of Cancer Biology, Radiation Oncology and Pediatrics, Vanderbilt University Medical Center, Nashville, TN37232, U.S.A.

<sup>3</sup> To whom correspondence should be addressed (email jed.friedman@ucdenver.edu).

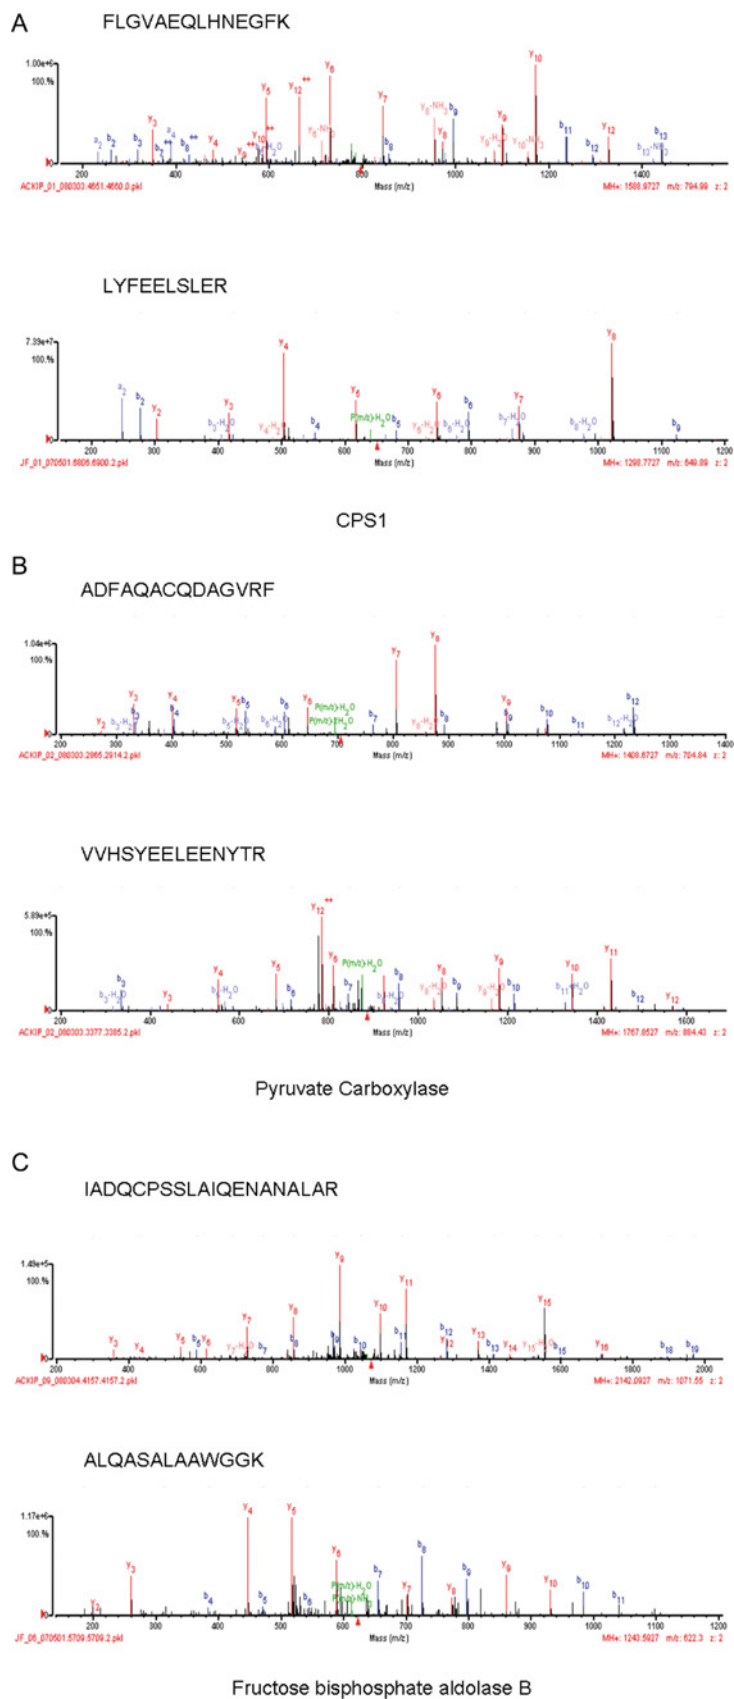

**Figure S1 Spectra used for validation of (A) CPS1, (B) PC and (C) aldase B**

Our protein identification validation strategy included manual assessment of at least two high-scoring peptide fragmentation mass spectra. The amino acid sequence of each peptide is provided and b- and y-type fragmentation products are labelled.

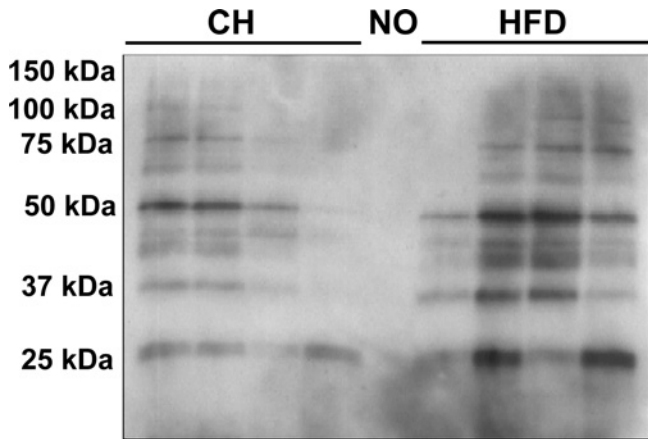

**Figure S2 HFD increases oxidized mitochondrial proteins in liver**

NO, empty lane. The molecular mass in kDa is shown of the left-hand side.

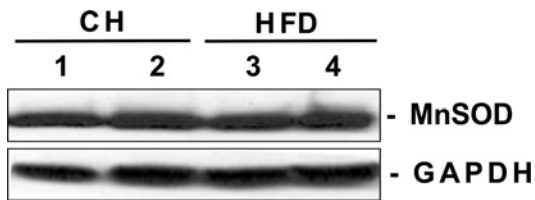

**Figure S3 Western blot showing equal amounts of MnSOD (manganese superoxide dismutase) and GAPDH in liver extracts from CH- and HFD-fed animals**

**Table S1 Summary of protein identification from three separate experiments**

Three different experiments in which livers from HFD- and CH-fed mice were harvested, proteins were extracted and enriched using the anti-(acetylated-lysine) antibody, and band densities were compared. Proteins marked with an asterisk were identified from whole-cell lysate preparations, whereas the other proteins were identified in high-salt-enriched fractions (see the Experimental section of the main paper). Protein identifications required a minimum of two peptide hits to each protein, a protein score minimum of 13, a peptide score minimum of 10 and an SPI of 85%. # OP, the total number of spectra assigned to the given protein; # DP, the number of distinct peptides assigned to the given protein. We required # DP to be at least two. Score, the summed score from the DP peptides. AA (%), the percentage of amino acids detected, considering the distinct peptides. Molecular masses and accession numbers are from the SwissProt database (UniProtKB/Swiss-Prot Release 57.6; 495880 entries). A total of 193 unique proteins were identified in these experiments. Band numbers listed were used in each experiment and do not necessarily compare between experiments. Although some effort was made to excise the same bands in different experiments performed on different days, additional bands were excised with numbers that do not correlate with previous experiments. Therefore protein identification was assessed separately for each band in each experiment. Within each group of identifications from every band, the molecular mass provided by the protein database was compared with the molecular mass observed on the gel. Proteins were only included if, for a given band, their molecular mass appeared within 1 S.D. of the average molecular mass for the band.

| Band number | # OP | # DP | Score | AA (%) | Molecular mass (Da) | Accession number | Protein name                                                                  |
|-------------|------|------|-------|--------|---------------------|------------------|-------------------------------------------------------------------------------|
| Band 1      |      |      |       |        |                     |                  |                                                                               |
|             | 82   | 54   | 912   | 47     | 164619              | Q8C196           | Carbamoyl-phosphate synthase [ammonia], mitochondrial precursor               |
| *           | 8    | 6    | 93.86 | 5      | 164619              | Q8C196           | Carbamoyl-phosphate synthase [ammonia], mitochondrial precursor               |
| *           | 52   | 32   | 492.5 | 27     | 164619              | Q8C196           | Carbamoyl-phosphate synthase [ammonia], mitochondrial precursor               |
| Band 2      |      |      |       |        |                     |                  |                                                                               |
|             | 10   | 8    | 125.5 | 17     | 61337               | P26443           | Glutamate dehydrogenase 1, mitochondrial precursor                            |
|             | 6    | 5    | 80.67 | 15     | 61120               | Q8BWQ1           | UDP-glucuronosyltransferase 2A3 precursor                                     |
|             | 9    | 6    | 94.42 | 20     | 60721               | Q9DBG1           | Cytochrome P450 27, mitochondrial precursor                                   |
|             | 4    | 3    | 52.17 | 7      | 60124               | Q63886           | UDP-glucuronosyltransferase 1-1 precursor                                     |
|             | 26   | 17   | 277.9 | 37     | 59753               | Q03265           | ATP synthase subunit $\alpha$ , mitochondrial precursor                       |
|             | 5    | 5    | 81.83 | 12     | 59673               | Q8JZZO           | UDP-glucuronosyltransferase 3A2 precursor                                     |
|             | 4    | 4    | 61.64 | 8      | 58720               | O35728           | Cytochrome P450 4A14 precursor                                                |
|             | 8    | 7    | 111.3 | 20     | 57855               | Q64459           | Cytochrome P450 3A11                                                          |
|             | 3    | 3    | 44.19 | 10     | 57553               | Q9CZS1           | Aldehyde dehydrogenase X, mitochondrial precursor                             |
|             | 10   | 10   | 160.4 | 28     | 56976               | Q8CIM7           | Cytochrome P450 2D26                                                          |
|             | 15   | 13   | 209.9 | 27     | 56805               | Q05421           | Cytochrome P450 2E1                                                           |
|             | 21   | 15   | 241.6 | 45     | 56538               | P47738           | Aldehyde dehydrogenase, mitochondrial precursor                               |
|             | 9    | 6    | 108.4 | 18     | 56301               | P56480           | ATP synthase subunit $\beta$ , mitochondrial precursor                        |
|             | 2    | 2    | 34.92 | 5      | 54468               | P24549           | Retinal dehydrogenase 1                                                       |
|             | 8    | 5    | 83.24 | 14     | 53943               | P47740           | Fatty aldehyde dehydrogenase                                                  |
|             | 6    | 6    | 88.65 | 16     | 52610               | Q63836           | Selenium-binding protein 2                                                    |
|             | 5    | 4    | 58.42 | 15     | 50152               | P05213           | Tubulin $\alpha$ -1B chain                                                    |
|             | 10   | 7    | 112.5 | 25     | 49671               | P99024           | Tubulin $\beta$ -5 chain                                                      |
| *           | 19   | 12   | 192.3 | 15     | 129685              | Q05920           | Pyruvate carboxylase, mitochondrial precursor                                 |
| Band 3      |      |      |       |        |                     |                  |                                                                               |
|             | 14   | 8    | 133.7 | 17     | 60856               | P17717           | UDP-glucuronosyltransferase 2B5 precursor                                     |
|             | 14   | 11   | 170.1 | 28     | 59753               | Q03265           | ATP synthase subunit $\alpha$ , mitochondrial precursor                       |
|             | 3    | 2    | 34.35 | 7      | 58939               | Q91XD4           | Formimidoyltransferase-cyclodeaminase                                         |
|             | 7    | 5    | 74.65 | 13     | 57960               | Q9JMA7           | Cytochrome P450 3A41                                                          |
|             | 3    | 3    | 41.59 | 6      | 57493               | Q64464           | Cytochrome P450 3A13                                                          |
|             | 4    | 4    | 67.87 | 9      | 57234               | P24456           | Cytochrome P450 2D10                                                          |
|             | 7    | 6    | 84.25 | 17     | 56976               | Q8CIM7           | Cytochrome P450 2D26                                                          |
|             | 3    | 3    | 41.01 | 8      | 56823               | P54869           | Hydroxymethylglutaryl-CoA synthase, mitochondrial precursor                   |
|             | 3    | 2    | 34.27 | 6      | 56805               | Q05421           | Cytochrome P450 2E1                                                           |
|             | 5    | 5    | 80.36 | 11     | 56741               | P20852           | Cytochrome P450 2A5                                                           |
|             | 23   | 17   | 278.4 | 46     | 56538               | P47738           | Aldehyde dehydrogenase, mitochondrial precursor                               |
|             | 28   | 19   | 335.7 | 55     | 56301               | P56480           | ATP synthase subunit $\beta$ , mitochondrial precursor                        |
|             | 7    | 6    | 89.3  | 17     | 56174               | P56593           | Cytochrome P450 2A12                                                          |
|             | 9    | 7    | 116.5 | 19     | 55780               | P56657           | Cytochrome P450 2C40                                                          |
|             | 18   | 14   | 230.4 | 41     | 55730               | Q64458           | Cytochrome P450 2C29                                                          |
|             | 11   | 9    | 157.5 | 25     | 55514               | P56654           | Cytochrome P450 2C37                                                          |
|             | 3    | 3    | 49.12 | 6      | 54566               | P11679           | Keratin, type II cytoskeletal 8                                               |
|             | 2    | 2    | 31.22 | 9      | 53943               | P47740           | Fatty aldehyde dehydrogenase                                                  |
|             | 11   | 9    | 139.4 | 31     | 51929               | P16331           | Phenylalanine-4-hydroxylase                                                   |
|             | 3    | 3    | 46.06 | 9      | 51740               | Q91Y10           | Argininosuccinate lyase                                                       |
|             | 4    | 4    | 55.87 | 9      | 50114               | P10126           | Elongation factor 1- $\alpha$ 1                                               |
|             | 4    | 3    | 45.95 | 11     | 49831               | P68372           | Tubulin $\beta$ -2C chain                                                     |
|             | 2    | 2    | 38.98 | 7      | 48995               | Q9D2G2           | Dihydropyridyllysine-residue succinyltransferase 2-oxoglutarate dehydrogenase |
|             | 7    | 6    | 102.2 | 24     | 48101               | Q922R8           | Protein disulfide-isomerase A6 precursor                                      |
|             | 11   | 8    | 125   | 23     | 43509               | Q91 × 83         | S-Adenosylmethionine synthetase isoform type-1                                |
| *           | 13   | 5    | 98.79 | 21     | 45021               | Q35490           | Betaine-homocysteine S-methyltransferase 1                                    |
| *           | 8    | 5    | 95.05 | 19     | 41858               | Q8BWT1           | 3-Ketoacyl-CoA thiolase, mitochondrial                                        |
| *           | 4    | 4    | 64.67 | 7      | 73529               | P38647           | Stress-70 protein, mitochondrial precursor                                    |
| *           | 7    | 5    | 85.43 | 11     | 72422               | P20029           | Glucose-regulated protein precursor of 78 kDa                                 |
| Band 4      |      |      |       |        |                     |                  |                                                                               |
|             | 4    | 4    | 61.96 | 10     | 61337               | P26443           | Glutamate dehydrogenase 1, mitochondrial precursor                            |
|             | 3    | 3    | 52.9  | 6      | 60124               | Q63886           | UDP-glucuronosyltransferase 1-1 precursor                                     |
|             | 12   | 12   | 195   | 31     | 59753               | Q03265           | ATP synthase subunit $\alpha$ , mitochondrial precursor                       |
|             | 5    | 4    | 58.38 | 9      | 57234               | P24456           | Cytochrome P450 2D10                                                          |

Table S1 (Continued)

| Band number | # OP | # DP | Score | AA (%) | Molecular mass (Da) | Accession number | Protein name                                                                  |
|-------------|------|------|-------|--------|---------------------|------------------|-------------------------------------------------------------------------------|
|             | 33   | 20   | 327.4 | 36     | 56823               | P54869           | Hydroxymethylglutaryl-CoA synthase, mitochondrial precursor                   |
|             | 11   | 9    | 139.7 | 29     | 56538               | P47738           | Aldehyde dehydrogenase, mitochondrial precursor                               |
|             | 9    | 8    | 130.4 | 23     | 56301               | P56480           | ATP synthase subunit $\beta$ , mitochondrial precursor                        |
|             | 4    | 2    | 34.55 | 7      | 55514               | P56654           | Cytochrome P450 2C37                                                          |
|             | 5    | 5    | 78.49 | 13     | 54566               | P11679           | Keratin, type II cytoskeletal 8                                               |
|             | 9    | 7    | 115.7 | 24     | 54371               | P97807           | Fumarate hydratase, mitochondrial precursor                                   |
|             | 3    | 3    | 45.2  | 11     | 53943               | P47740           | Fatty aldehyde dehydrogenase                                                  |
|             | 12   | 8    | 155.4 | 26     | 52769               | Q9CZ13           | Cytochrome <i>b-c</i> <sub>1</sub> complex subunit 1, mitochondrial precursor |
|             | 10   | 8    | 109.3 | 23     | 52576               | Q9D379           | Epoxide hydrolase 1                                                           |
|             | 18   | 14   | 242.3 | 37     | 51387               | Q99JY0           | Trifunctional enzyme subunit $\beta$ , mitochondrial precursor                |
|             | 3    | 3    | 52.61 | 10     | 50537               | P61598           | Rab GDP dissociation inhibitor $\beta$                                        |
|             | 10   | 6    | 90.73 | 22     | 50493               | P58710           | L-gulonolactone oxidase                                                       |
|             | 11   | 7    | 116.2 | 20     | 50114               | P10126           | Elongation factor 1- $\alpha$ 1                                               |
|             | 4    | 3    | 51.6  | 8      | 50061               | Q9D8N0           | Elongation factor 1- $\gamma$                                                 |
|             | 5    | 5    | 74.41 | 15     | 49509               | Q8BFR5           | Elongation factor Tu, mitochondrial precursor                                 |
|             | 3    | 3    | 50.23 | 7      | 49014               | O54734           | Dolichyl-diphosphooligosaccharide-protein glycosyltransferase 48 kDa subunit  |
|             | 6    | 4    | 72.32 | 14     | 47572               | Q9QZ85           | Interferon-inducible GTPase 1                                                 |
|             | 17   | 14   | 243.1 | 48     | 47538               | P05784           | Keratin, type I cytoskeletal 18                                               |
|             | 6    | 6    | 107.2 | 22     | 47141               | P17182           | $\alpha$ -Enolase                                                             |
|             | 12   | 10   | 165.6 | 35     | 46154               | P60843           | Eukaryotic initiation factor 4A-I                                             |
|             | 4    | 4    | 60.76 | 15     | 45021               | Q35490           | Betaine-homocysteine S-methyltransferase 1                                    |
| *           | 33   | 10   | 198.6 | 37     | 41858               | Q8BWT1           | 3-Ketoacyl-CoA thiolase, mitochondrial                                        |
| *           | 3    | 3    | 45.35 | 7      | 62516               | P34914           | Epoxide hydrolase 2                                                           |
| *           | 6    | 5    | 86.01 | 11     | 60956               | P63038           | 60 kDa heat-shock protein, mitochondrial precursor                            |
| *           | 3    | 2    | 35.67 | 4      | 59766               | P24270           | Catalase                                                                      |
| *           | 4    | 3    | 48.21 | 6      | 59126               | P32020           | Non-specific lipid-transfer protein                                           |
| Band 5      |      |      |       |        |                     |                  |                                                                               |
|             | 11   | 10   | 162.6 | 26     | 56823               | P54869           | Hydroxymethylglutaryl-CoA synthase, mitochondrial precursor                   |
|             | 4    | 4    | 56.42 | 12     | 51387               | Q99JY0           | Trifunctional enzyme subunit $\beta$ , mitochondrial precursor                |
|             | 10   | 8    | 130.3 | 28     | 50114               | Q9Z2I9           | Succinyl-CoA ligase [ADP-forming] $\beta$ -chain, mitochondrial precursor     |
|             | 5    | 4    | 58.19 | 9      | 50114               | P10126           | Elongation factor 1- $\alpha$ 1                                               |
|             | 9    | 8    | 142.5 | 30     | 48647               | Q60759           | Glutaryl-CoA dehydrogenase, mitochondrial precursor                           |
|             | 11   | 8    | 138.8 | 26     | 48235               | Q9DB77           | Cytochrome <i>b-c</i> <sub>1</sub> complex subunit 2, mitochondrial precursor |
|             | 4    | 4    | 64.42 | 8      | 47908               | P51174           | Long-chain specific acyl-CoA dehydrogenase, mitochondrial precursor           |
|             | 8    | 6    | 108.8 | 25     | 47538               | P05784           | Keratin, type I cytoskeletal 18                                               |
|             | 4    | 3    | 51.3  | 9      | 46840               | Q9Z2I8           | Succinyl-CoA ligase [GDP-forming] $\beta$ -chain, mitochondrial precursor     |
|             | 35   | 17   | 298.8 | 49     | 46585               | P16460           | Argininosuccinate synthase                                                    |
|             | 4    | 4    | 70.31 | 12     | 46482               | P45952           | Medium-chain specific acyl-CoA dehydrogenase, mitochondrial precursor         |
|             | 4    | 4    | 58.88 | 15     | 46301               | Q99J08           | SEC14-like protein 2                                                          |
|             | 5    | 5    | 88.33 | 20     | 45250               | Q99PG0           | Arylacetylamide deacetylase                                                   |
|             | 4    | 4    | 54.31 | 14     | 45054               | P49429           | 4-Hydroxyphenylpyruvate dioxygenase                                           |
|             | 7    | 6    | 96.45 | 19     | 44816               | Q8QZT1           | Acetyl-CoA acetyltransferase, mitochondrial precursor                         |
|             | 4    | 4    | 60.9  | 14     | 44551               | P09411           | Phosphoglycerate kinase 1                                                     |
|             | 3    | 2    | 36.3  | 7      | 43509               | Q91 $\times$ 83  | S-Adenosylmethionine synthetase isoform type-1                                |
|             | 2    | 2    | 31.33 | 6      | 43232               | P35486           | Pyruvate dehydrogenase E1 component subunit $\alpha$ , somatic form           |
|             | 5    | 4    | 78.88 | 18     | 42120               | P15105           | Glutamine synthetase                                                          |
| *           | 16   | 4    | 78.61 | 17     | 43996               | Q8VCH0           | 3-Ketoacyl-CoA thiolase B, peroxisomal precursor                              |
| *           | 10   | 6    | 100.9 | 22     | 41858               | Q8BWT1           | 3-Ketoacyl-CoA thiolase, mitochondrial                                        |
| *           | 14   | 6    | 116.2 | 23     | 39772               | P00329           | Alcohol dehydrogenase 1                                                       |
| *           | 9    | 5    | 79.43 | 11     | 50114               | P10126           | Elongation factor 1- $\alpha$ 1                                               |
| *           | 3    | 2    | 38.26 | 8      | 47538               | P05784           | Keratin, type I cytoskeletal 18                                               |
| *           | 6    | 2    | 30.45 | 6      | 45021               | Q35490           | Betaine-homocysteine S-methyltransferase 1                                    |
| *           | 5    | 2    | 39.36 | 7      | 43509               | Q91 $\times$ 83  | S-Adenosylmethionine synthetase isoform type-1                                |
| Band 6      |      |      |       |        |                     |                  |                                                                               |
|             | 9    | 7    | 116.4 | 28     | 42509               | Q9DC69           | NADH dehydrogenase [ubiquinone] 1 $\alpha$ subcomplex subunit 9               |
|             | 2    | 2    | 35.53 | 7      | 41793               | P63260           | Actin, cytoplasmic 2                                                          |
|             | 8    | 5    | 89.38 | 19     | 39772               | P00329           | Alcohol dehydrogenase 1                                                       |
|             | 4    | 3    | 44.17 | 12     | 39507               | Q91Y97           | Fructose-bisphosphate aldolase B                                              |
|             | 3    | 2    | 32.56 | 8      | 38937               | Q9D051           | Pyruvate dehydrogenase E1 component subunit $\beta$ , mitochondrial precursor |
|             | 6    | 5    | 70.82 | 12     | 38195               | Q922Q1           | MOSC domain-containing protein 2, mitochondrial precursor                     |
|             | 4    | 4    | 73.4  | 21     | 37979               | Q9CW42           | MOSC domain-containing protein 1, mitochondrial precursor                     |
|             | 14   | 9    | 143.2 | 40     | 37048               | P70694           | Oestradiol 17 $\beta$ -dehydrogenase 5                                        |
|             | 11   | 6    | 96.26 | 30     | 35810               | P16858           | Glyceraldehyde-3-phosphate dehydrogenase                                      |
|             | 5    | 4    | 53.51 | 16     | 35612               | P08249           | Malate dehydrogenase, mitochondrial precursor                                 |
|             | 5    | 3    | 44.63 | 15     | 34995               | Q9WUM5           | Succinyl-CoA ligase [GDP-forming] subunit $\alpha$ , mitochondrial precursor  |
|             | 5    | 4    | 79.53 | 25     | 34593               | Q8VBT2           | L-Serine dehydratase                                                          |
|             | 3    | 3    | 43.2  | 13     | 34401               | P47962           | 60S ribosomal protein L5                                                      |
|             | 7    | 6    | 103.1 | 33     | 34217               | P14869           | 60S acidic ribosomal protein P0                                               |
|             | 2    | 2    | 31.58 | 9      | 34099               | Q91XE0           | Glycine N-acyltransferase                                                     |

**Table S1 (Continued)**

| Band number | # OP | # DP | Score | AA (%) | Molecular mass (Da) | Accession number | Protein name                                            |
|-------------|------|------|-------|--------|---------------------|------------------|---------------------------------------------------------|
|             | 14   | 10   | 160.8 | 40     | 33466               | P52196           | Thiosulfate sulfurtransferase                           |
|             | 2    | 2    | 32.17 | 9      | 32952               | Q9JMD3           | PCTP-like protein                                       |
|             | 3    | 3    | 55.76 | 11     | 32410               | Q99MZ7           | Peroxisomal trans-2-enoyl-CoA reductase                 |
|             | 4    | 4    | 59.86 | 15     | 32364               | P50172           | Corticosteroid 11 $\beta$ -dehydrogenase isozyme 1      |
| *           | 4    | 2    | 40.21 | 8      | 41858               | Q8BWT1           | 3-ketoacyl-CoA thiolase, mitochondrial                  |
| *           | 27   | 8    | 143.3 | 25     | 39772               | P00329           | Alcohol dehydrogenase 1                                 |
| *           | 3    | 2    | 31.85 | 9      | 39507               | Q91Y97           | Fructose-bisphosphate aldolase B                        |
| *           | 20   | 7    | 126.2 | 31     | 45021               | Q35490           | Betaine-homocysteine S-methyltransferase 1              |
| Band 7      |      |      |       |        |                     |                  |                                                         |
|             | 6    | 5    | 81.76 | 25     | 28949               | Q9CQQ7           | ATP synthase B chain, mitochondrial precursor           |
|             | 4    | 4    | 68.31 | 24     | 28049               | Q9DD20           | Methyltransferase-like protein 7B precursor             |
|             | 10   | 7    | 115.1 | 45     | 27419               | O08756           | 3-Hydroxyacyl-CoA dehydrogenase type-2                  |
|             | 7    | 5    | 81.99 | 19     | 27376               | Q64471           | Glutathione transferase theta 1                         |
|             | 5    | 4    | 75.85 | 26     | 25970               | P10649           | Glutathione transferase Mu 1                            |
|             | 5    | 5    | 82.59 | 26     | 25704               | Q9DCM2           | Glutathione transferase kappa 1                         |
|             | 5    | 3    | 52    | 22     | 25361               | P30115           | Glutathione transferase A3                              |
|             | 4    | 2    | 35.88 | 14     | 24871               | O08709           | Peroxioredoxin-6                                        |
|             | 11   | 7    | 126.2 | 42     | 24275               | Q9WVLO           | Maleylacetoacetate isomerase                            |
|             | 2    | 2    | 31.26 | 14     | 24146               | Q9CZM2           | 60S Ribosomal protein L15                               |
|             | 2    | 2    | 33.82 | 12     | 23897               | Q91V41           | Ras-related protein Rab-14                              |
|             | 2    | 2    | 28.29 | 10     | 23413               | P35278           | Ras-related protein Rab-5C                              |
|             | 4    | 3    | 47.31 | 16     | 23364               | Q9DB20           | ATP synthase subunit O, mitochondrial precursor         |
|             | 3    | 2    | 30.6  | 11     | 22382               | Q9CQC9           | GTP-binding protein SAR1b                               |
|             | 6    | 6    | 82.85 | 29     | 22177               | P35700           | Peroxioredoxin-1                                        |
|             | 6    | 6    | 102.5 | 33     | 21694               | O55022           | Membrane-associated progesterone receptor component 1   |
|             | 2    | 2    | 37.64 | 13     | 21645               | P35980           | 60S Ribosomal protein L18                               |
| *           | 4    | 3    | 44.52 | 10     | 39772               | P00329           | Alcohol dehydrogenase 1                                 |
| *           | 5    | 2    | 34.37 | 9      | 35039               | P25688           | Uricase                                                 |
| *           | 4    | 2    | 33.51 | 12     | 41793               | P63260           | Actin, cytoplasmic 2                                    |
| Band 8      |      |      |       |        |                     |                  |                                                         |
| *           | 18   | 13   | 187.8 | 26     | 59753               | Q03265           | ATP synthase subunit $\alpha$ , mitochondrial precursor |
| Band 9      |      |      |       |        |                     |                  |                                                         |
| *           | 2    | 2    | 32.77 | 9      | 39507               | Q91Y97           | Fructose-bisphosphate aldolase B                        |
| Band 10     |      |      |       |        |                     |                  |                                                         |
| *           | 2    | 2    | 36.07 | 5      | 42120               | P15105           | Glutamine synthetase                                    |
| *           | 4    | 4    | 49.1  | 18     | 22177               | P35700           | Peroxioredoxin-1                                        |

Received 27 May 2010/30 September 2010; accepted 2 November 2010  
 Published as BJ Immediate Publication 2 November 2010, doi:10.1042/BJ20100791
